# Supplementary material for: Unlocking the potential of Ni-rich NCM811 cathodes: chlorine substitution as a pathway to prevent oxygen release and transition-metal dissolution
Source: Royal Society of Chemistry journal article supplement (doi:10.1039/d5ta07961f), 2026-01-01
Supplement: d5ta07961f1.pdf [file d5ta07961f1.pdf]

**Unlocking the Potential of Ni-rich NCM811 Cathodes: Chlorine Substitution as a Pathway  
to Prevent Oxygen Release and Transition-Metal Dissolution**

Santhanamoorthi Nachimuthu<sup>a,†</sup>, Shi-Hong Xu<sup>a,†</sup>, Ryo Maezono<sup>b, c</sup>, Bing Joe Hwang<sup>d, e, f</sup>,  
and Jyh-Chiang Jiang<sup>a, f,\*</sup>

<sup>a</sup>Computational and Theoretical Chemistry Laboratory, Department of Chemical Engineering,  
National Taiwan University of Science and Technology, Taipei 10607, Taiwan

<sup>b</sup>School of Information Science, Japan Advanced Institute of Science and Technology (JAIST),  
Nomi, Ishikawa 923-1292, Japan

<sup>c</sup>Graduate Major in Materials and Information Sciences, Institute of Science Tokyo,  
2-12-1-S6-22 Ookayama, Meguro-ku, Tokyo 152-8550, Japan

<sup>d</sup>Department of Chemical Engineering, National Taiwan University of Science and Technology,  
Taipei 10607, Taiwan

<sup>e</sup>National Synchrotron Radiation Research Center (NSRRC), Hsinchu 30076, Taiwan

<sup>f</sup>Sustainable Electrochemical Energy Development Center, National Taiwan University of  
Science and Technology, Taipei 106, Taiwan

\*Corresponding author Email: [jcjiang@mail.ntust.edu.tw](mailto:jcjiang@mail.ntust.edu.tw)

Telephone: +886-2-27376653. Fax: +886-2-27376644

<sup>†</sup> First authors contributed equally to this work

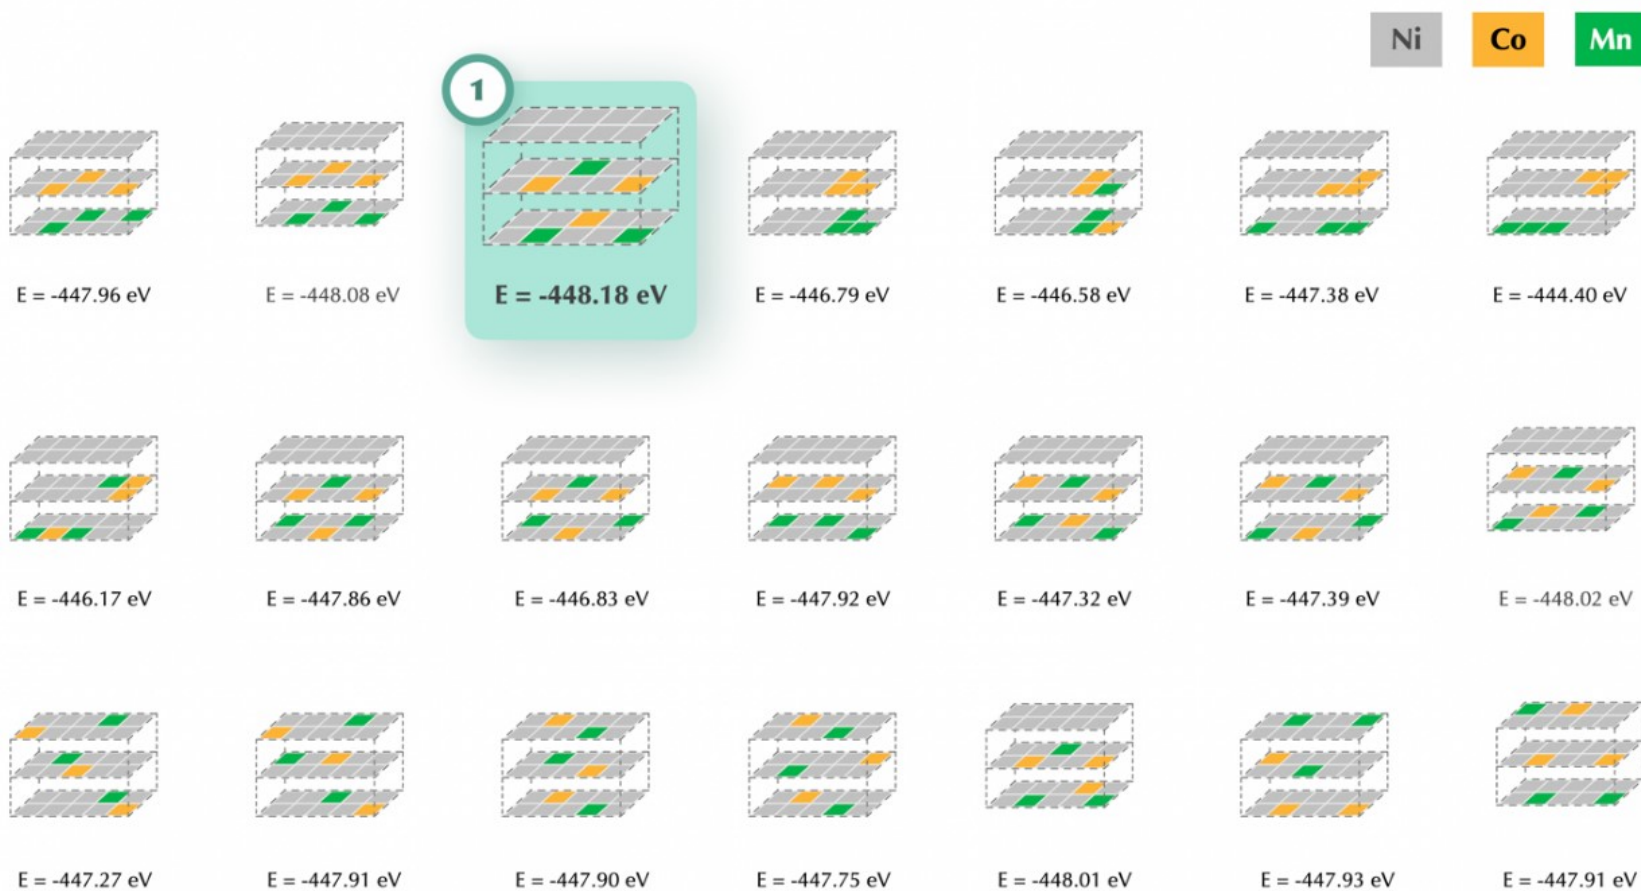

**Figure S1.** Schematic representation of possible bulk NCM811 configurations derived from  $\text{LiNiO}_2$ , showing different Co and Mn substitutional arrangements at Ni sites. The corresponding total energies of these configurations are also shown.

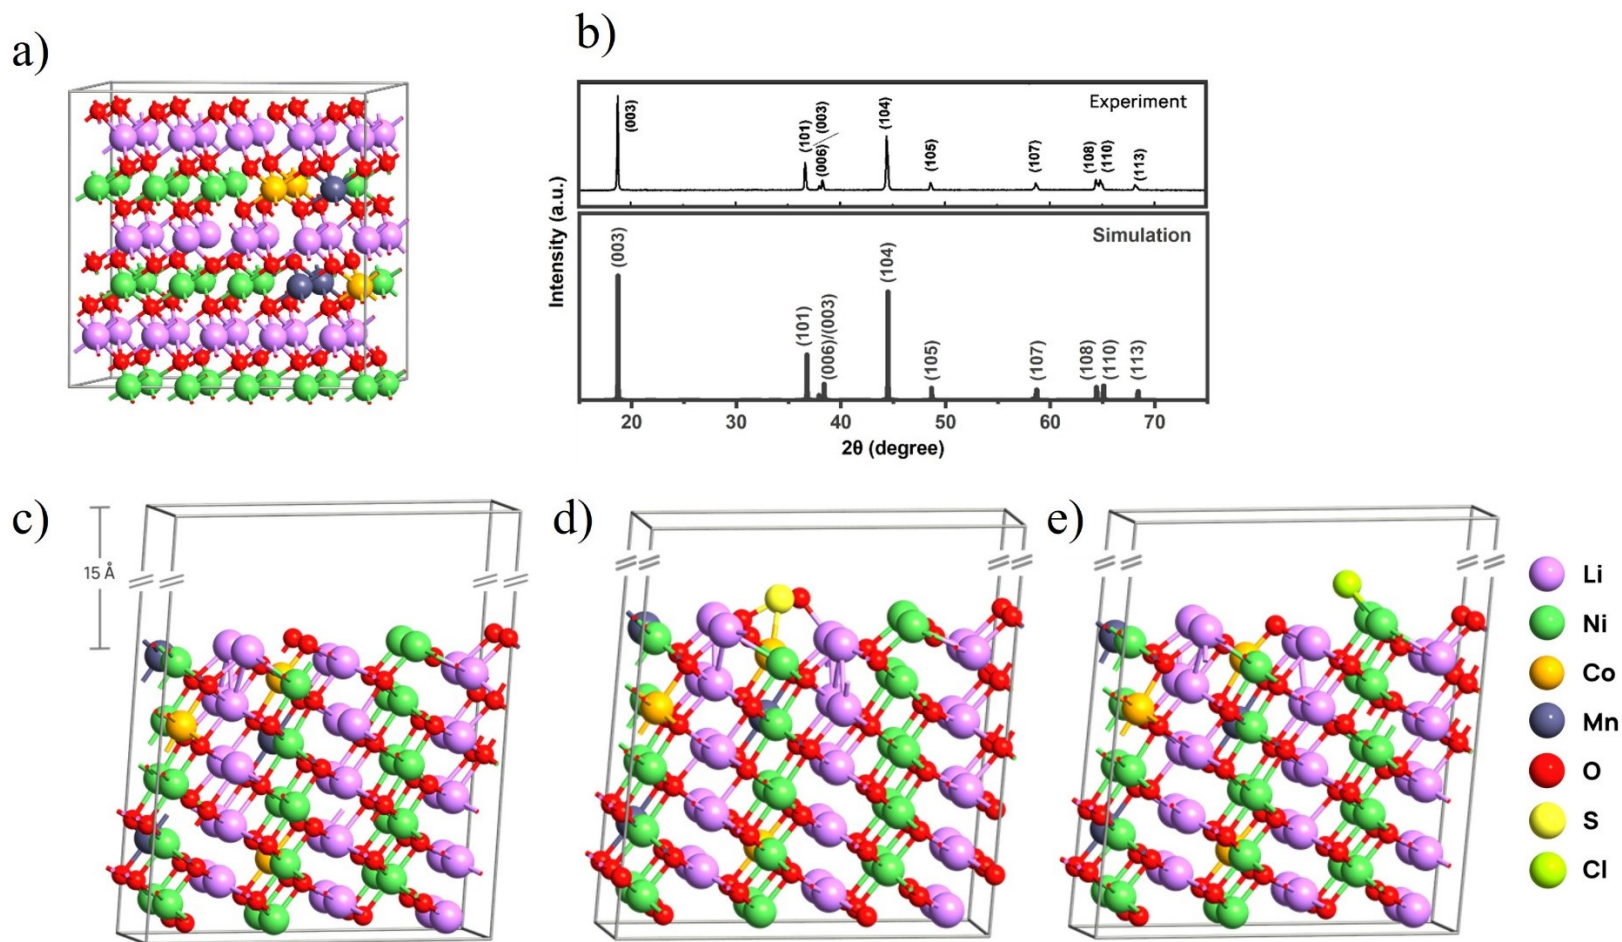

**Figure S2.** (a) Optimized structure of the most thermodynamically stable bulk NCM811 unit cell, (b) simulated and experimental XRD patterns of NCM811, (c) most stable termination of the pristine NCM811 (006) surface, (d) S-doped NCM811 surface, (e) Cl-doped NCM811 surface.

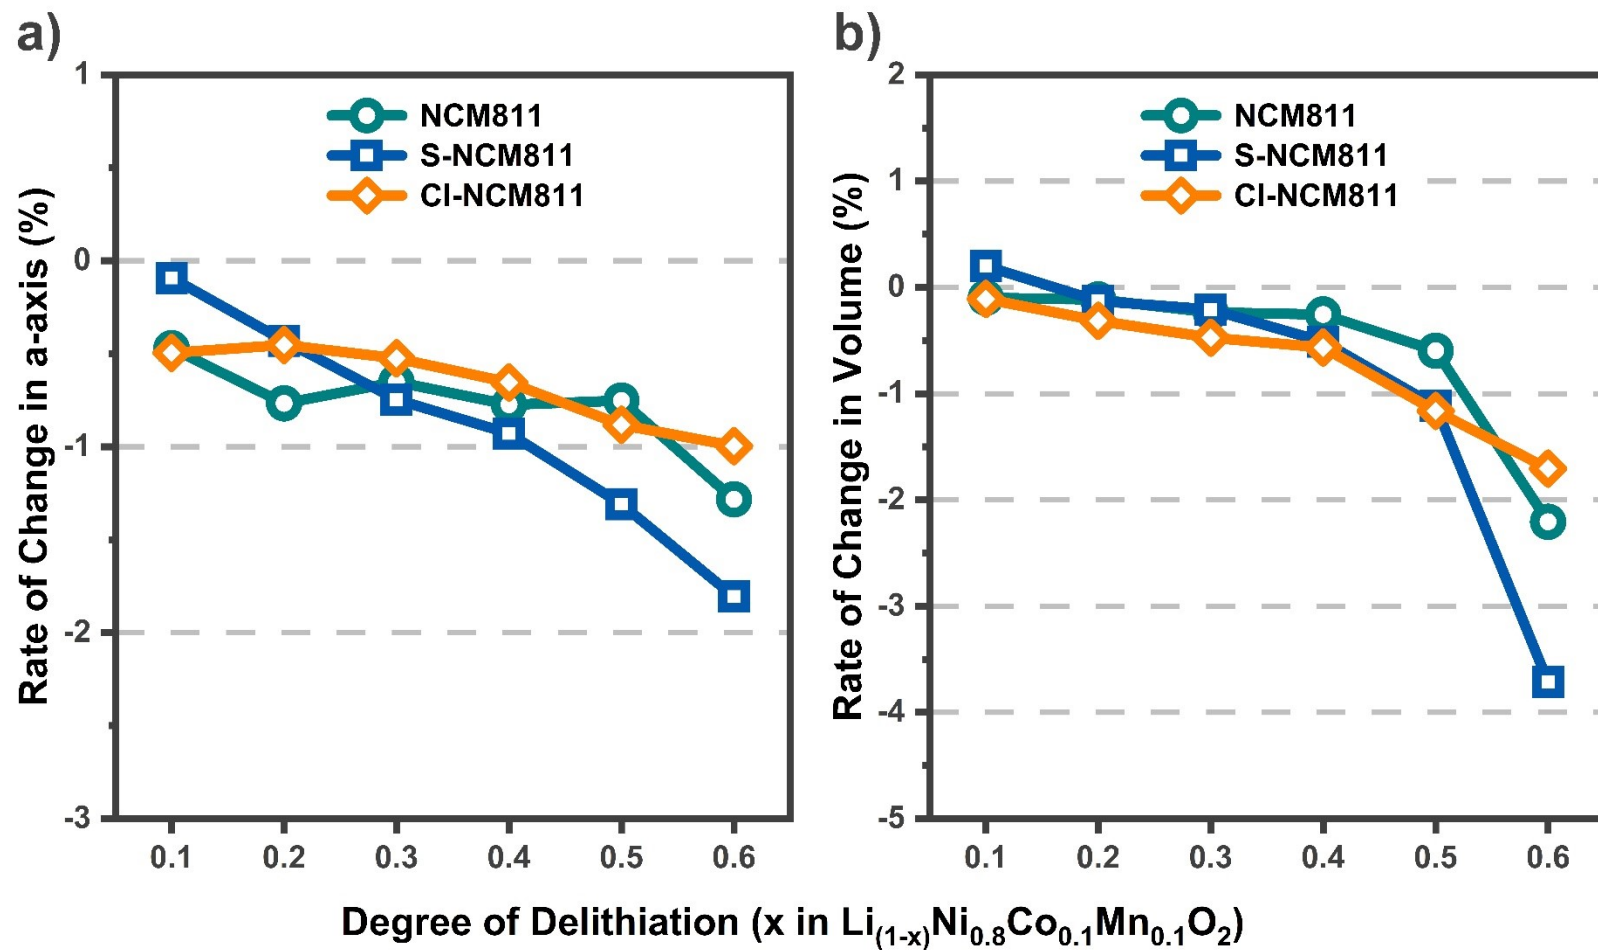

**Figure S3.** Rate of change (ROC) in (a) the in-plane lattice parameter  $a$  and (b) the unit cell volume of pristine NCM811, S-NCM811, and CI-NCM811 surfaces as a function of delithiation.

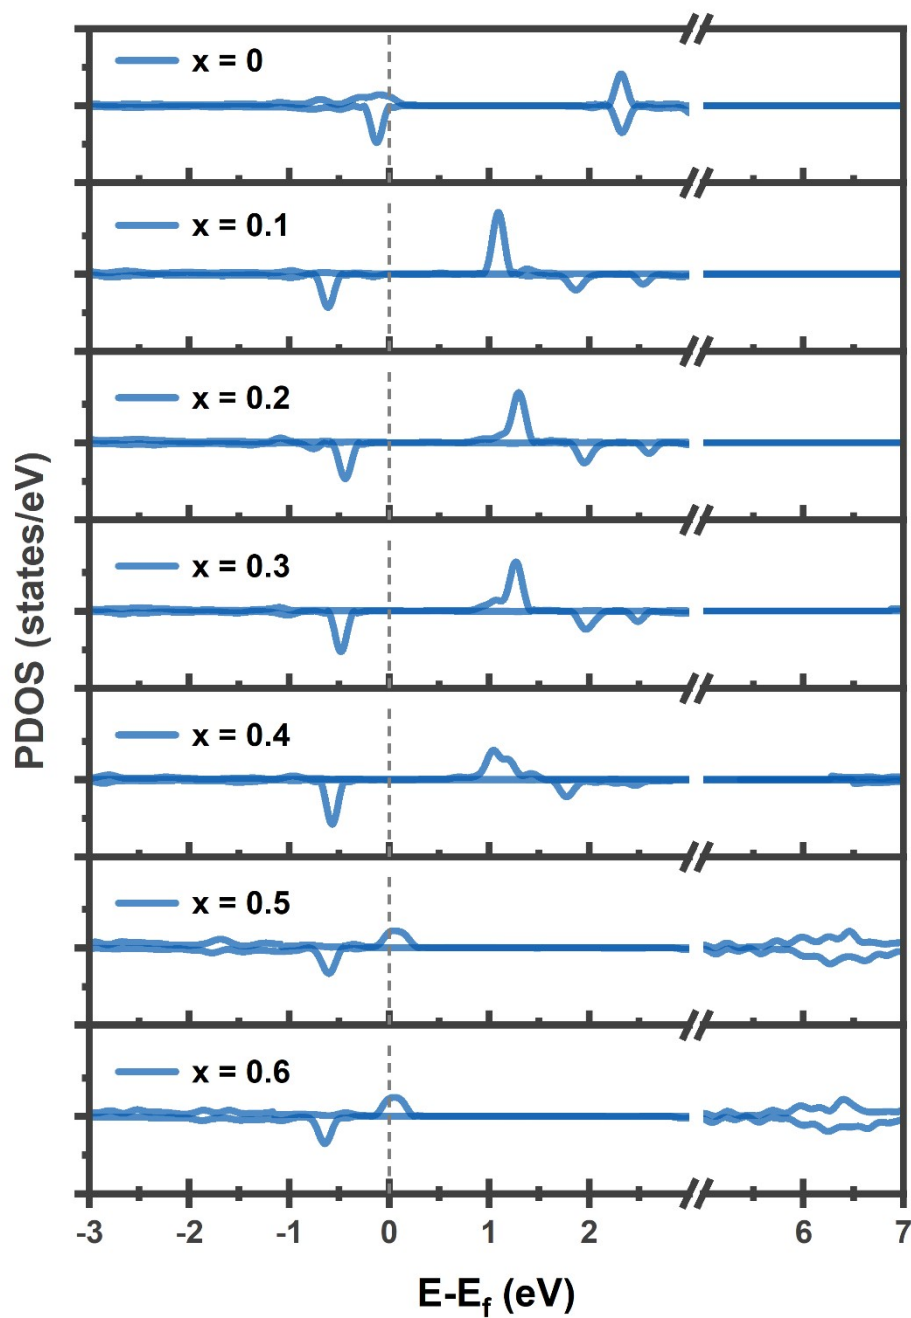

**Figure S4.** Projected density of states (PDOS) of the S p-orbital in the S-NCM811 surface at delithiation levels from  $x = 0$  to  $x = 0.6$ . The vertical dashed line represents the Fermi level.



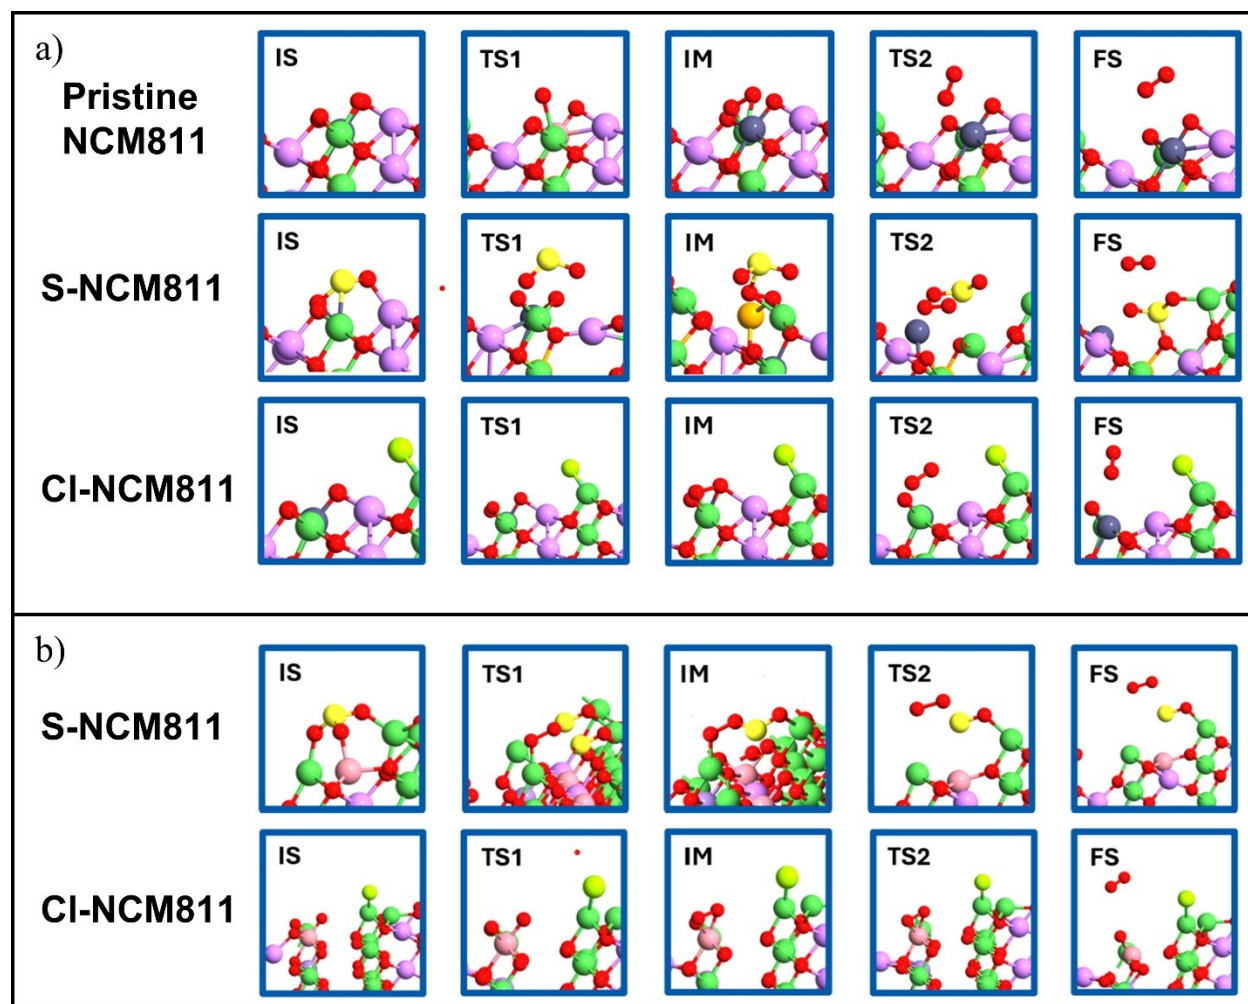

**Figure S5.** Snapshots of intermediate structures during  $O_2^-$  formation and  $O_2$  release on NCM811 surfaces: (a) Pristine NCM811, S-NCM811, and CI-NCM811 surfaces at a delithiation level of  $x = 0.3$ , and (b) S-NCM811 and CI-NCM811 surfaces at a delithiation level of  $x = 0.6$ .

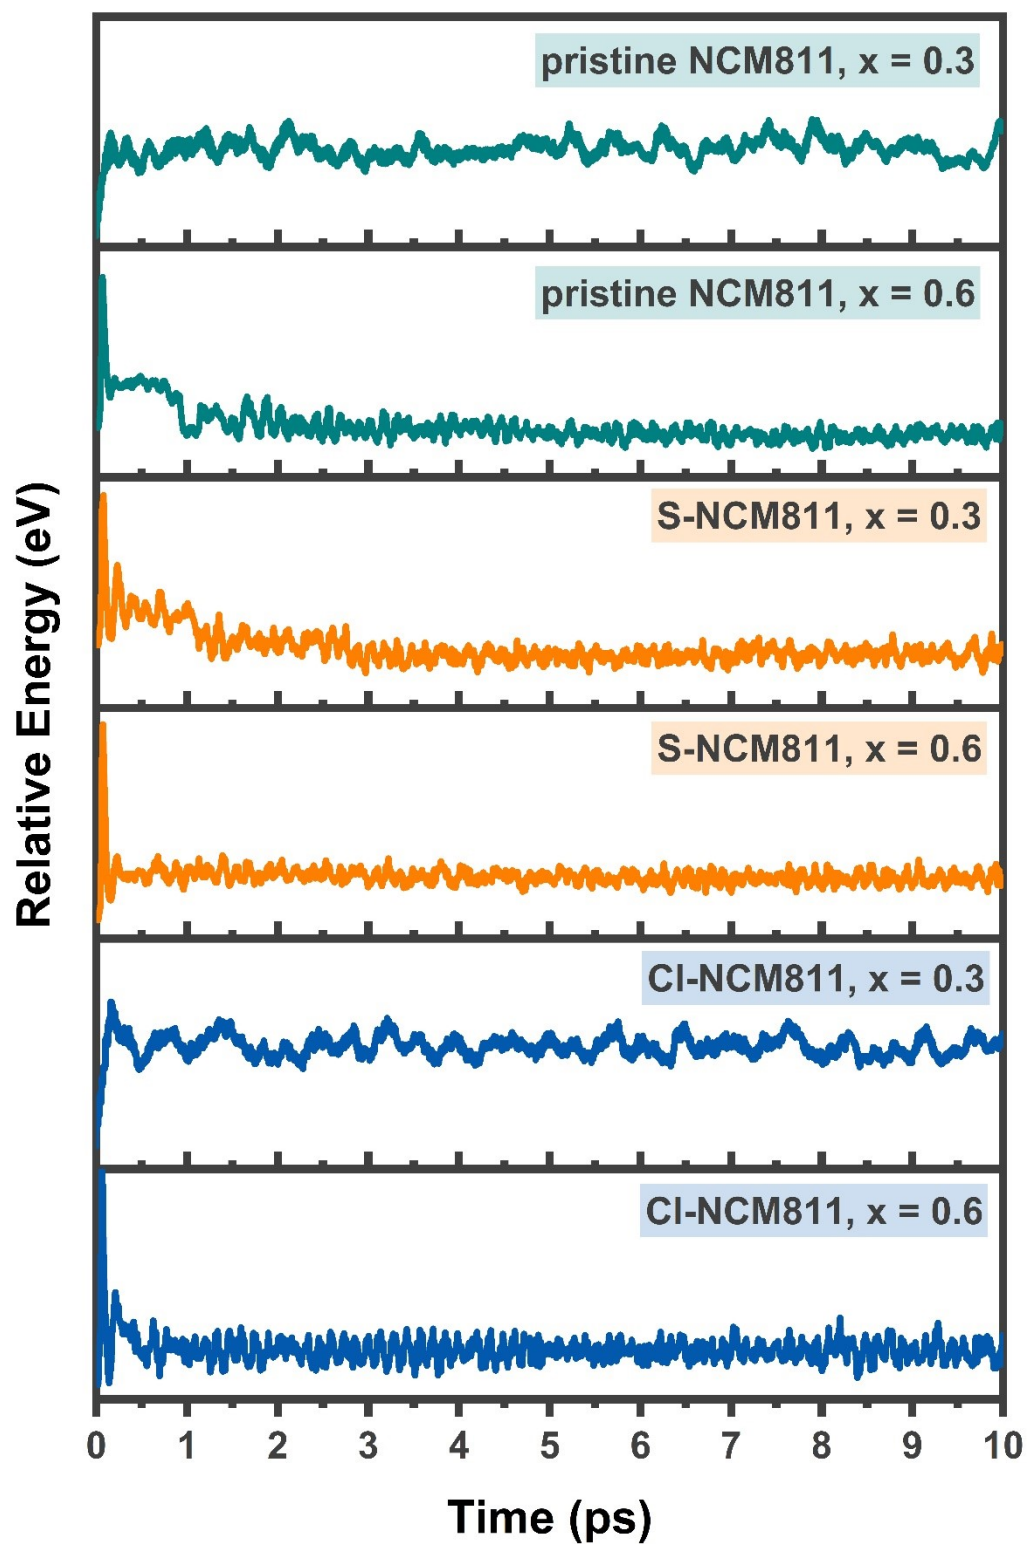

**Figure S6.** Relative total energy as a function of simulation time from AIMD for pristine, S-NCM811, and Cl-NCM811 surfaces at delithiation levels of  $x = 0.3$  and  $x = 0.6$ .

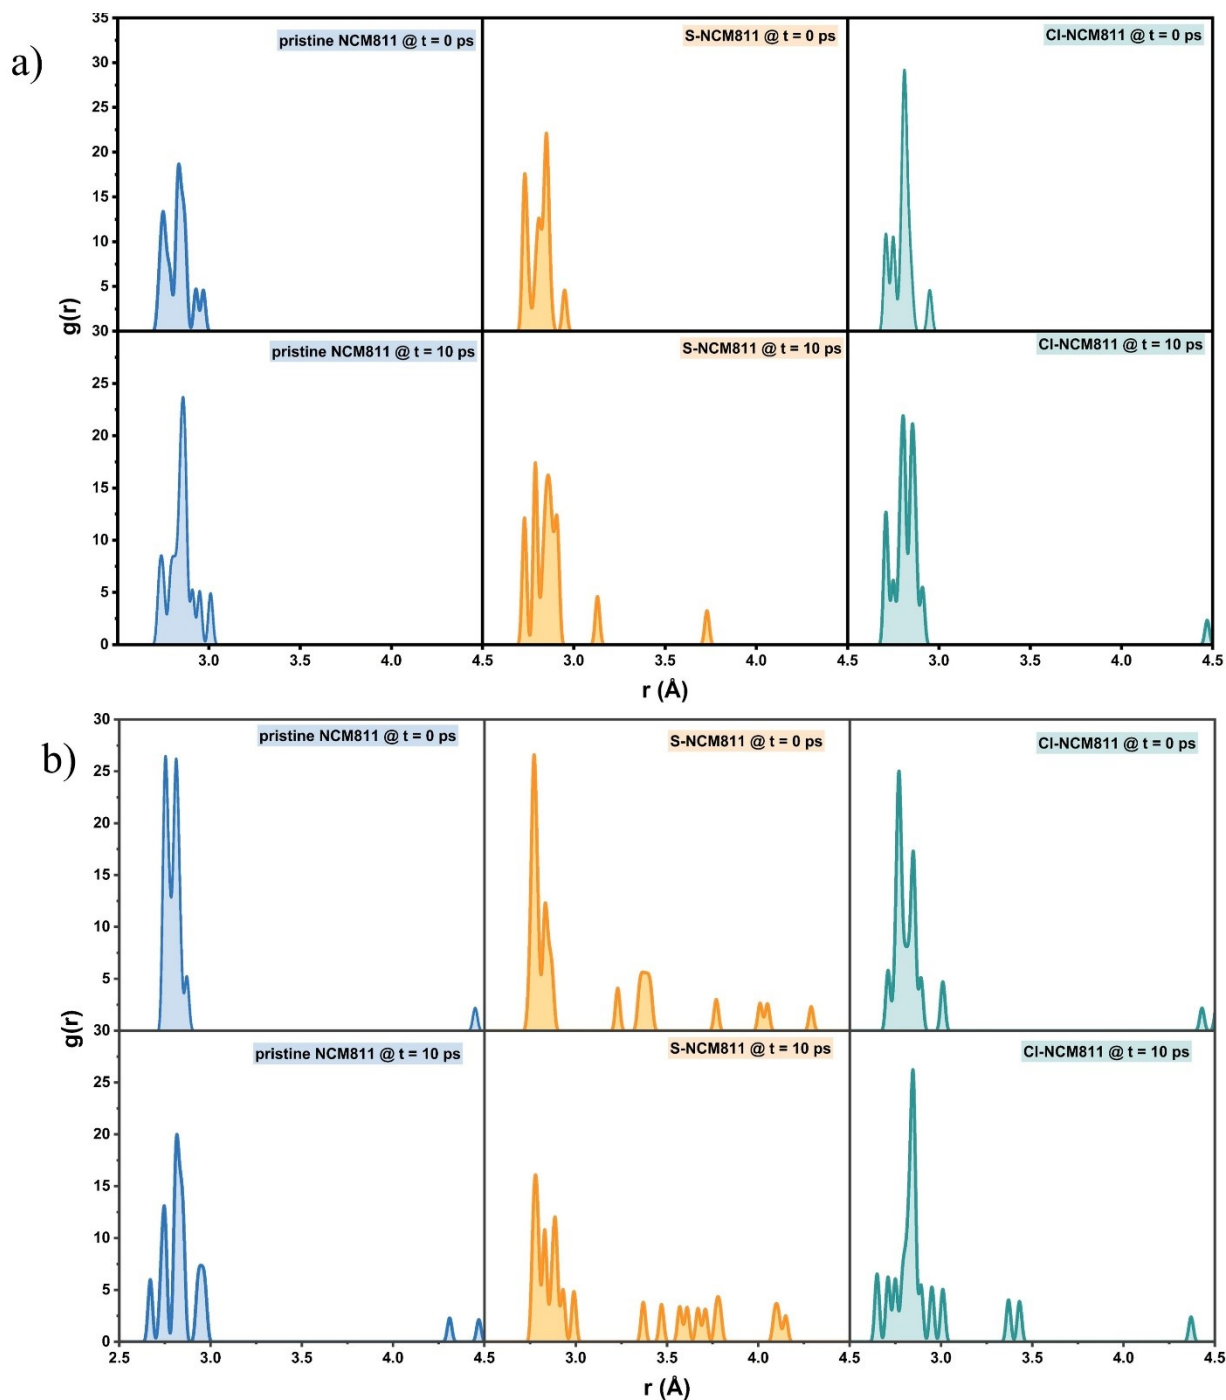

**Figure S7.** RDFs of Co-Ni pairs in pristine, S-NCM811, and CI-NCM811 surfaces at delithiation levels of (a)  $x = 0.3$  and (b)  $x = 0.6$ , shown at the initial ( $t = 0$  ps) and final ( $t = 10$  ps) stages of the AIMD simulations.



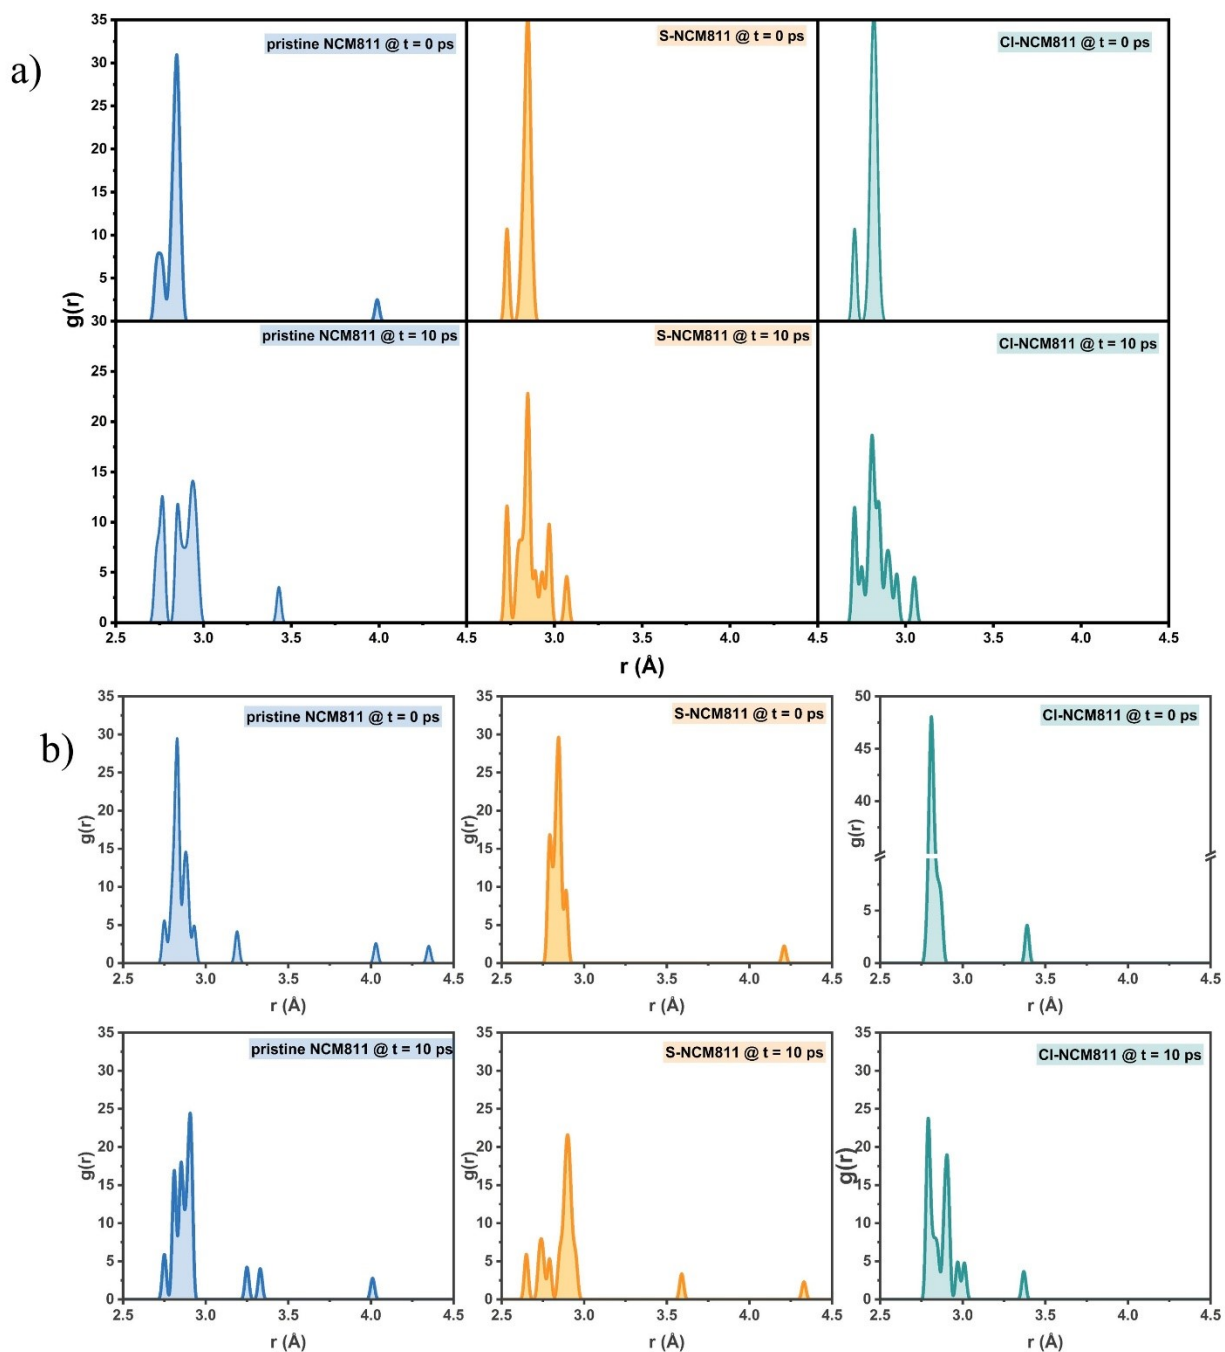

**Figure S8.** RDFs of Mn-Ni pairs in pristine, S-NCM811, and Cl-NCM811 surfaces at delithiation levels of (a)  $x = 0.3$  and (b)  $x = 0.6$ , shown at the initial ( $t = 0$  ps) and final ( $t = 10$  ps) stages of the AIMD simulations.

**Table S1.** Oxidation states and corresponding magnetic moments of transition metals.

| Species          | Magnetic moment ( $\mu\text{B}$ ) |
|------------------|-----------------------------------|
| $\text{Ni}^{2+}$ | 1.75                              |
| $\text{Ni}^{3+}$ | 1.15                              |
| $\text{Ni}^{4+}$ | 0.11                              |
| $\text{Co}^{3+}$ | -0.04                             |
| $\text{Co}^{4+}$ | -1.32                             |
| $\text{Mn}^{4+}$ | -3.32                             |

**Table S3.** Distribution of  $\text{Ni}^{2+}$ ,  $\text{Ni}^{3+}$ , and  $\text{Ni}^{4+}$  species in the top two layers of pristine and Cl-NCM811 surfaces at delithiation levels of  $x = 0$  and  $x = 0.5$

| <b>Pristine NCM811</b>     | <b>x = 0</b>                       |                                    |                                    | <b>x = 0.5</b>                     |                                    |                                    |
|----------------------------|------------------------------------|------------------------------------|------------------------------------|------------------------------------|------------------------------------|------------------------------------|
|                            | <b><math>\text{Ni}^{2+}</math></b> | <b><math>\text{Ni}^{3+}</math></b> | <b><math>\text{Ni}^{4+}</math></b> | <b><math>\text{Ni}^{2+}</math></b> | <b><math>\text{Ni}^{3+}</math></b> | <b><math>\text{Ni}^{4+}</math></b> |
| Ni                         | 4                                  | 4                                  | 0                                  | 1                                  | 4                                  | 3                                  |
| <b>Cl-NCM811</b>           |                                    |                                    |                                    |                                    |                                    |                                    |
| Ni coordinated with Cl     | 3                                  | 1                                  | 0                                  | 4                                  | 0                                  | 0                                  |
| Ni not coordinated with Cl | 0                                  | 4                                  | 0                                  | 0                                  | 2                                  | 2                                  |

**Table S2.** Oxidation states of Co and Mn in pristine and anion-doped NCM811 at different delithiation levels.

| Delithiation Level<br>(x) | Pristine NCM811 |     |     |     |     |     |     | S-NCM811 |     |     |     |     |     |     | Cl-NCM811 |     |     |     |     |     |     |
|---------------------------|-----------------|-----|-----|-----|-----|-----|-----|----------|-----|-----|-----|-----|-----|-----|-----------|-----|-----|-----|-----|-----|-----|
|                           | 0.0             | 0.1 | 0.2 | 0.3 | 0.4 | 0.5 | 0.6 | 0.0      | 0.1 | 0.2 | 0.3 | 0.4 | 0.5 | 0.6 | 0.0       | 0.1 | 0.2 | 0.3 | 0.4 | 0.5 | 0.6 |
| Mn1                       | +4              | +4  | +4  | +4  | +4  | +4  | +4  | +4       | +4  | +4  | +4  | +4  | +4  | +4  | +4        | +4  | +4  | +4  | +4  | +4  | +4  |
| Mn2                       | +4              | +4  | +4  | +4  | +4  | +4  | +4  | +4       | +4  | +4  | +4  | +4  | +4  | +4  | +4        | +4  | +4  | +4  | +4  | +4  | +4  |
| Mn3                       | +4              | +4  | +4  | +4  | +4  | +4  | +4  | +4       | +4  | +4  | +4  | +4  | +4  | +4  | +4        | +4  | +4  | +4  | +4  | +4  | +4  |
| Co1                       | +3              | +3  | +3  | +3  | +3  | +3  | +3  | +3       | +3  | +3  | +3  | +3  | +4  | +4  | +3        | +3  | +3  | +3  | +3  | +3  | +3  |
| Co2                       | +3              | +3  | +3  | +3  | +3  | +4  | +4  | +3       | +3  | +3  | +3  | +3  | +4  | +4  | +3        | +3  | +3  | +3  | +3  | +4  | +4  |
| Co3                       | +4              | +4  | +4  | +4  | +4  | +4  | +4  | +3       | +4  | +4  | +4  | +4  | +4  | +4  | +4        | +4  | +4  | +4  | +4  | +4  | +4  |
